# Supplementary material for: Vibrationally-resolved RIXS reveals OH-group formation in oxygen redox active Li-ion battery cathodes
Source: Royal Society of Chemistry journal article supplement (doi:10.1039/d4cp01766h), 2024-01-01

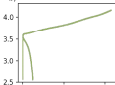

c) Aged 0-50: lithiated

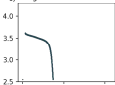

d) Aged 0-50: delithiated

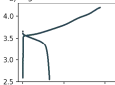

e) Aged 0-100: lithiated

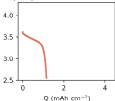

f) Aged 0-100: delithiated

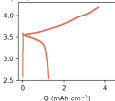

Supplement: d4cp01766h3.pdf [file d4cp01766h3.pdf]
