# Supplementary material for: Vibrationally-resolved RIXS reveals OH-group formation in oxygen redox active Li-ion battery cathodes
Source: Royal Society of Chemistry journal article supplement (doi:10.1039/d4cp01766h), 2024-01-01

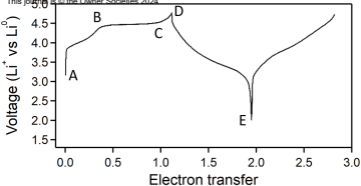

Supplement: d4cp01766h4.pdf [file d4cp01766h4.pdf]
